# Supplementary material for: Patients’ Experiences and Communication with Teledermatology versus Face-to-Face Dermatology
Source: J Clin Med. 2022 Sep 21;11(19):5528. doi: 10.3390/jcm11195528 (PMC9573490; doi:10.3390/jcm11195528)
Supplement: Supplementary file 1 [file jcm-11-05528-s001.zip › jcm-1911874-supplementary.pdf]

**Table S1.** Results derived from patient experiences and communication questionnaire.

|                                                                                       | Teledermatology |     |      | Face-to-Face Dermatology |     |      | p-value | Effect size | Interpretation |
|---------------------------------------------------------------------------------------|-----------------|-----|------|--------------------------|-----|------|---------|-------------|----------------|
|                                                                                       | Min             | Max | Mean | Min                      | Max | Mean |         |             |                |
| Q1. Did the clinicians talk to you in a way that was easy to understand?              | 1               | 5   | 4.37 | 3                        | 5   | 4.47 | 0.20    | -           | -              |
| Q2. Do you have confidence in the clinicians' professional skills?                    | 1               | 5   | 4.49 | 1                        | 5   | 4.34 | <0.01   | 0.11        | Very small     |
| Q3. Did you get sufficient information about your diagnosis/afflictions?              | 1               | 5   | 4.36 | 3                        | 5   | 4.59 | <0.01   | 0.16        | Small          |
| Q4. Did you perceive the treatment as adapted to your situation?                      | 1               | 5   | 4.36 | 1                        | 5   | 4.28 | 0.60    | -           | -              |
| Q5. Were you involved in decisions regarding your treatment?                          | 1               | 5   | 3.66 | 3                        | 5   | 4.58 | <0.01   | 0.42        | Large          |
| Q6. Did you perceive the institution's work as well organized?                        | 1               | 5   | 3.60 | 1                        | 5   | 2.86 | <0.01   | 0.31        | Moderate       |
| Q7. Did you have to wait before you were admitted for services at the institution?    | 3               | 5   | 4.33 | 3                        | 5   | 4.31 | 0.65    | -           | -              |
| Q8. Overall, was the help and treatment you received at the institution satisfactory? | 1               | 5   | 2.69 | 3                        | 5   | 4.42 | <0.01   | 0.55        | Large          |
| Q9. Overall, what benefit have you had from the care at the institution?              | 1               | 4   | 1.20 | 1                        | 3   | 1.12 | 0.07    | -           | -              |
| Q10. Do you believe that you were in any way given incorrect treatment? *             | 1               | 5   | 2.81 | 1                        | 4   | 1.24 | <0.01   | 0.53        | Large          |
| Q11. I was asked questions in an aggressive manner*                                   | 1               | 1   | 1.00 | 1                        | 1   | 1.00 | 1.00    | -           | -              |
| Q12. I was given answers in an aggressive manner*                                     | 1               | 1   | 1.00 | 1                        | 1   | 1.00 | 1.00    | -           | -              |
| Q13. I was treated with kindness                                                      | 1               | 5   | 4.50 | 2                        | 5   | 4.12 | <0.01   | 0.26        | Moderate       |
| Q14. I was treated in a rude and hasty manner*                                        | 1               | 5   | 1.45 | 1                        | 3   | 1.51 | <0.01   | 0.04        | Very small     |
| Q15. The healthcare provider addressed me with a smile                                | 2               | 5   | 3.90 | 1                        | 4   | 2.70 | <0.01   | 0.69        | Large          |
| Q16. The healthcare provider was able to manage the consultation                      | 1               | 5   | 3.69 | 1                        | 5   | 3.28 | <0.01   | 0.28        | Moderate       |
| Q1. Did the clinicians talk to you in a way that was easy to understand?              | 3               | 5   | 4.97 | 5                        | 5   | 5.00 | 0.014   | 0.11        | Very small     |

\*Negative items
